# Supplementary material
Source: PubMed Central journal article supplement (PMC10411637)
Supplement: NIHMS1905448-supplement-2.pdf [file NIHMS1905448-supplement-2.pdf]

Supplementary figure 1

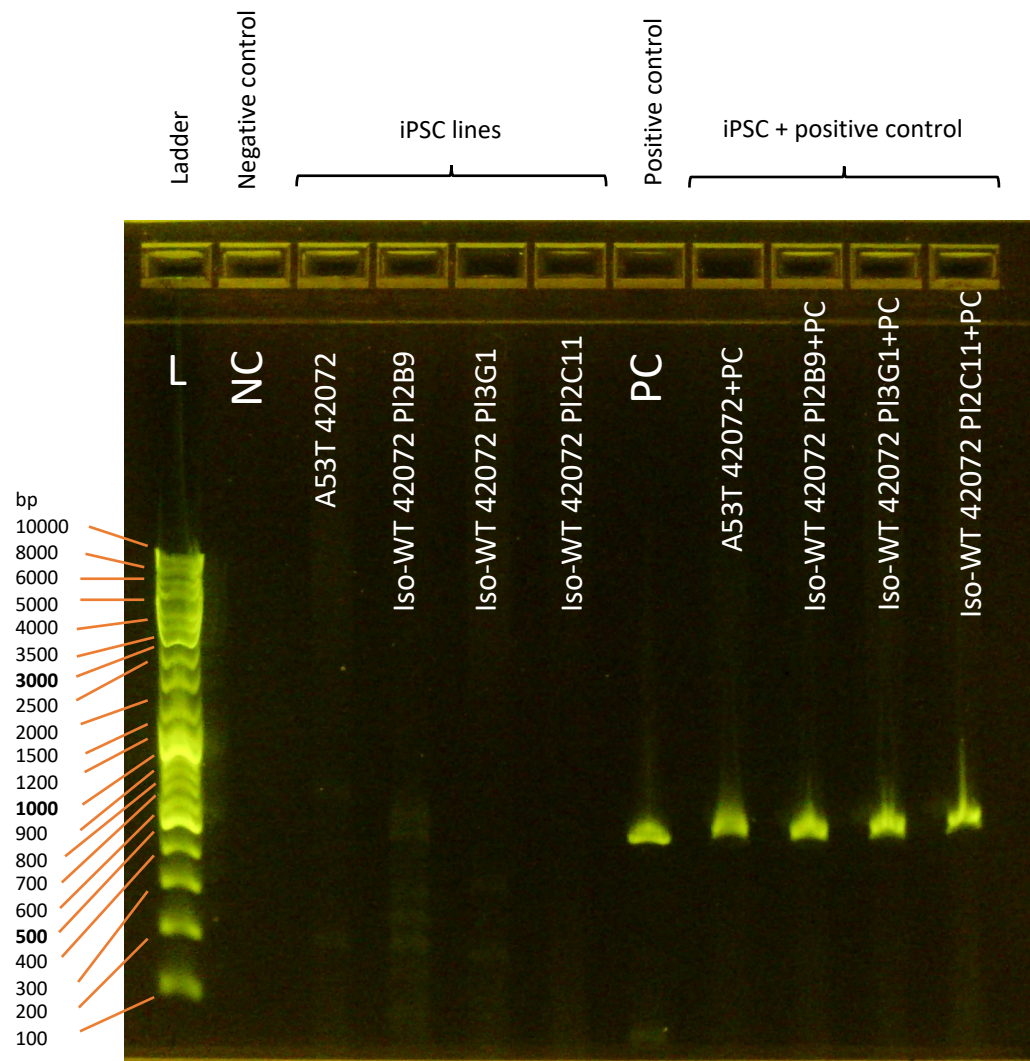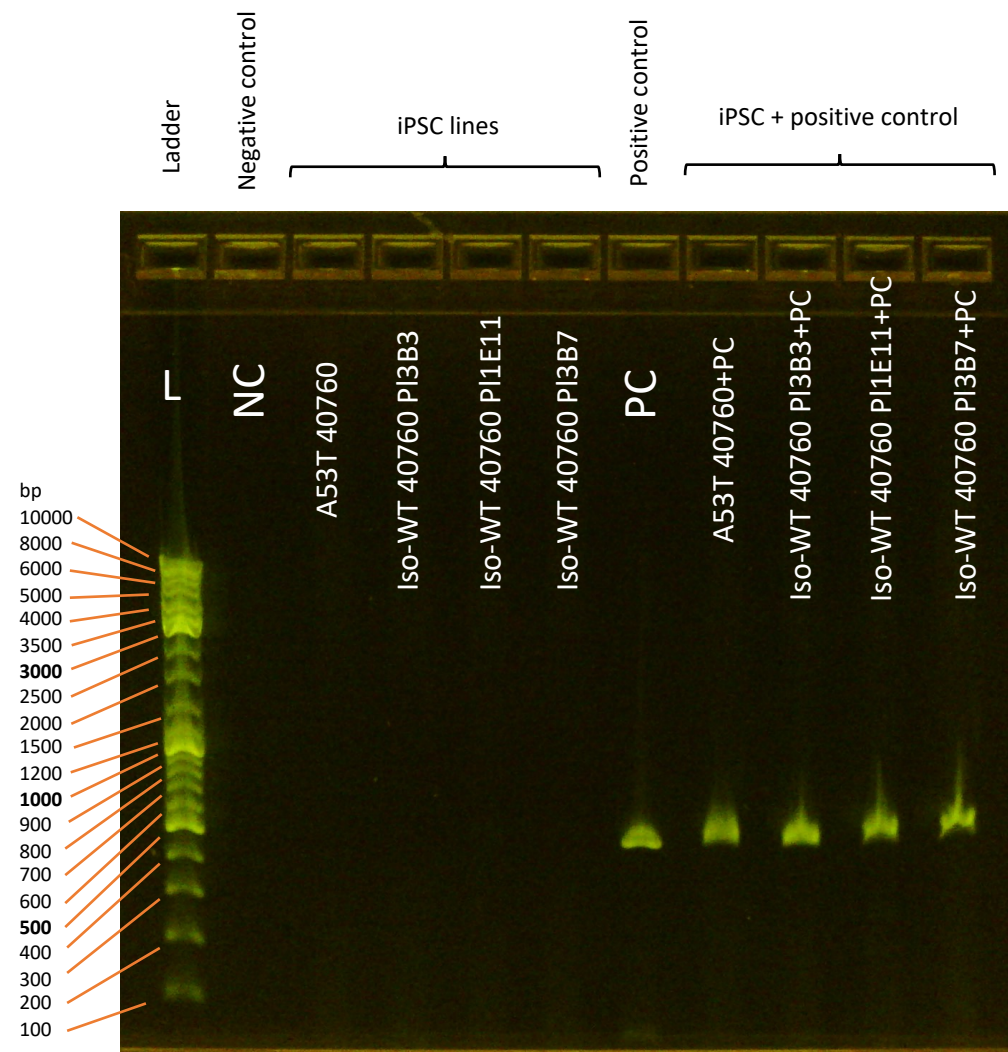

1% Agarose Gel; Mycoplasma positive samples are recognized by a PCR product ranging in size from 434 to 468 bp on agarose gel.
